# Supplementary material
Source: publisher figshare collection journal article supplement (https://geolsoc.figshare.com/ndownloader/files/14358533)
Supplement: Supplementary file 1 [file 14358533]

## Sheet: Sheet1
Sample	N13.28	N13.25	N14.13	N14.7	N14.3	N14.6	N14.216
Formation	Murihiku, Thtroa, lower arc	Murihiku, Thtroa, lower arc	Murihiku, Thtroa, lower arc	Murihiku, Nugget point, lower arc	Murihiku, Nugget point, lower arc	Murihiku, Nugget point, lower arc	Murihiku, Richmond, Champion Road
Location
Setting
Quartz	28.6667	33	13.3333	24.6667	46.6667	31.6667	11
Feldspar	13	18.6667	21.6667	25	19.3333	38.6667	37.3333
Lithics	58.3333	48.3333	65	50.3333	34	29.6667	51.6667
